# Supplementary material for: The oxygen-independent metabolism of cyclic monoterpenes in Castellaniella defragrans 65Phen
Source: PubMed Central journal article supplement (PMC4109377; doi:10.1186/1471-2180-14-164), 2014-06-21
Supplement: 1471-2180-14-164-S1.pdf [file 1471-2180-14-164-S1.pdf]

| Protein_id | 2D/LC <sup>a</sup> | 2D fold change / LC enrichment |  | No. of matching unique peptides | % Coverage | Gene annotation                                                          | Related gene product |            |                                      |               |
|------------|--------------------|--------------------------------|--|---------------------------------|------------|--------------------------------------------------------------------------|----------------------|------------|--------------------------------------|---------------|
|            |                    | level <sup>b</sup>             |  |                                 |            |                                                                          | E value              | % Identity | Organism                             | Accession no. |
| CDM22555   | LC                 | ++                             |  | 2                               | 6          | histidinol dehydrogenase                                                 | 0.0                  | 78         | <i>Alcaligenes faecalis</i>          | WP_003805416  |
| CDM22588   | LC                 | +                              |  | 27                              | 33         | short chain acyl-CoA dehydrogenase                                       | 0.0                  | 70         | <i>Achromobacter arsenitoxydans</i>  | WP_008168415  |
| CDM22589   | LC                 | ++                             |  | 4                               | 14         | 3-ketoacyl-CoA thiolase                                                  | 0.0                  | 75         | <i>Pusillimonas</i> sp. T7-7         | YP_004418047  |
| CDM22590   | LC                 | ++                             |  | 6                               | 9          | bifunctional enoyl-CoA hydratase / 3-hydroxyacyl-CoA dehydrogenase       | 0.0                  | 66         | <i>Pusillimonas</i> sp. T7-7         | YP_004418048  |
| CDM22592   | LC                 | ++                             |  | 5                               | 18         | long-chain fatty acid transport protein                                  | 0.0                  | 58         | <i>Alcaligenes</i> sp. HPC1271       | WP_009462456  |
| CDM22790   | 2D/LC              | 5.0/+                          |  | 3/2                             | 31/21      | hypothetical protein                                                     | 4E-37                | 63         | <i>Pusillimonas noertemannii</i>     | WP_017525672  |
| CDM22815   | 2D                 | 7.2                            |  | 28                              | 55         | ABC-type dipeptide transport system, periplasmic                         | 0.0                  | 62         | <i>Acidovorax</i> sp. CF316          | WP_007849611  |
| CDM22834   | LC                 | +                              |  | 7                               | 44         | ubiquinol-cytochrome C reductase iron-sulfur subunit                     | 2E-126               | 79         | <i>Pusillimonas</i> sp. T7-7         | YP_004418271  |
| CDM22981   | LC                 | ++                             |  | 3                               | 10         | hypothetical protein                                                     | 0.0                  | 87         | <i>Dechloromonas aromatica</i> RCB   | YP_283598     |
| CDM22999   | LC                 | ++                             |  | 3                               | 8          | hypothetical protein                                                     | 0.0                  | 63         | <i>Pusillimonas noertemannii</i>     | WP_017525303  |
| CDM23107   | 2D                 | 4.9                            |  | 20                              | 54         | ABC transport protein, substrate-binding component                       | 0.0                  | 83         | <i>Pusillimonas</i> sp. T7-7         | YP_004417743  |
| CDM23163   | LC                 | ++                             |  | 6                               | 21         | threonine dehydratase                                                    | 0.0                  | 83         | <i>Pusillimonas</i> sp. T7-7         | YP_004418520  |
| CDM23168   | LC                 | ++                             |  | 3                               | 14         | hypothetical protein                                                     | 5E-58                | 52         | <i>Pusillimonas noertemannii</i>     | WP_017524873  |
| CDM23355   | LC                 | ++                             |  | 2                               | 10         | carbamoyl phosphate synthase small subunit                               | 0.0                  | 81         | <i>Pusillimonas</i> sp. T7-7         | YP_004415263  |
| CDM23364   | LC                 | ++                             |  | 2                               | 6          | phosphoglucosamine mutase                                                | 0.0                  | 76         | <i>Pusillimonas</i> sp. T7-7         | YP_004415277  |
| CDM23503   | 2D                 | 4.0                            |  | 10                              | 57         | ketohydroxyglutarate aldolase                                            | 1E-98                | 73         | <i>Pusillimonas</i> sp. T7-7         | YP_004415557  |
| CDM23555   | LC                 | +                              |  | 6                               | 16         | 3-oxoacyl-ACP synthase                                                   | 0.0                  | 87         | <i>Pusillimonas</i> sp. T7-7         | YP_004416855  |
| CDM23571   | 2D/LC              | 10.6/++                        |  | 12/2                            | 38/7       | ABC transport protein, substrate-binding component                       | 0.0                  | 81         | <i>Pusillimonas</i> sp. T7-7         | YP_004416836  |
| CDM23572   | 2D/LC              | 3.2/+                          |  | 20/5                            | 26/12      | methylmalonate-semialdehyde dehydrogenase                                | 0.0                  | 80         | <i>Bordetella bronchiseptica</i> 253 | YP_006970713  |
| CDM23583   | 2D/LC              | 3.4/0                          |  | 19/6                            | 35/11      | acetyl-CoA synthetase                                                    | 0.0                  | 80         | <i>Pusillimonas</i> sp. T7-7         | YP_004416829  |
| CDM23629   | LC                 | +                              |  | 11                              | 34         | ABC-type proline/glycine betaine transport system, ATPase component      | 0.0                  | 81         | <i>Pusillimonas</i> sp. T7-7         | YP_004416797  |
| CDM23645   | 2D                 | 3.0                            |  | 15                              | 44         | ABC transport protein, substrate-binding component                       | 0.0                  | 74         | <i>Pusillimonas</i> sp. T7-7         | YP_004416670  |
| CDM23900   | LC                 | ++                             |  | 4                               | 12         | histidinol-phosphate aminotransferase                                    | 0.0                  | 73         | <i>Bordetella petrii</i> DSM 12804   | YP_001630494  |
| CDM23916   | 2D/LC              | 4.8/++                         |  | 10/3                            | 61/17      | alkyl hydroperoxide reductase subunit C-like protein                     | 5E-129               | 84         | <i>Pusillimonas</i> sp. T7-7         | YP_004416636  |
| CDM23981   | LC                 | ++                             |  | 3                               | 23         | DNA-3-methyladenine glycosidase I                                        | 6E-87                | 66         | <i>Pusillimonas</i> sp. T7-7         | YP_004418129  |
| CDM24003   | LC                 | ++                             |  | 3                               | 10         | xanthine permease                                                        | 0.0                  | 61         | <i>Pusillimonas</i> sp. T7-7         | YP_004418527  |
| CDM24020   | LC                 | ++                             |  | 2                               | 7          | coproporphyrinogen III oxidase, oxygen-independent                       | 0.0                  | 68         | <i>Pusillimonas</i> sp. T7-7         | YP_004415790  |
| CDM24134   | LC                 | ++                             |  | 3                               | 11         | 4-hydroxy-3-methylbut-2-en-1-yl diphosphate synthase                     | 0.0                  | 86         | <i>Bordetella bronchiseptica</i> 253 | YP_006967058  |
| CDM24151   | LC                 | +                              |  | 7                               | 19         | aldehyde dehydrogenase, NAD-dependent                                    | 0.0                  | 84         | <i>Pusillimonas</i> sp. T7-7         | YP_004417620  |
| CDM24267   | LC                 | ++                             |  | 2                               | 14         | transcriptional regulator, MerR family                                   | 1E-68                | 83         | <i>Pusillimonas</i> sp. T7-7         | YP_004416423  |
| CDM24360   | LC                 | ++                             |  | 4                               | 5          | 5-methyltetrahydropteroyltriglutamate / homocysteine S-methyltransferase | 0.0                  | 77         | <i>Bordetella petrii</i> DSM 12804   | YP_001630668  |
| CDM24415   | 2D                 | 2.6                            |  | 7                               | 43         | nitroreductase                                                           | 3E-69                | 58         | <i>Pusillimonas</i> sp. T7-7         | YP_004416172  |

|                |       |        |      |       |                                                                             |        |    |                                        |              |
|----------------|-------|--------|------|-------|-----------------------------------------------------------------------------|--------|----|----------------------------------------|--------------|
| CDM24438       | LC    | ++     | 2    | 9     | uridylyl kinase                                                             | 6E-145 | 89 | <i>Pusillimonas noertemannii</i>       | WP_017523417 |
| CDM24452       | LC    | ++     | 5    | 22    | PEP synthetase regulatory protein                                           | 8E-151 | 78 | <i>Pusillimonas</i> sp. T7-7           | YP_004416206 |
| CDM24483       | LC    | ++     | 2    | 11    | chemotaxis protein MotA                                                     | 7E-128 | 70 | <i>Alcaligenes</i> sp. EGD-AK7         | ERI34412     |
| CDM24494       | LC    | ++     | 4    | 22    | transcriptional regulator                                                   | 2E-137 | 89 | <i>Pusillimonas</i> sp. T7-7           | YP_004416261 |
| CDM24535       | 2D/LC | 6.2/++ | 18/3 | 49/10 | ABC-type glycerin-3-phosphate transport system, substrate-binding component | 0.0    | 76 | <i>Pusillimonas</i> sp. T7-7           | YP_004416342 |
| CDM24582       | LC    | ++     | 2    | 16    | glutathione S-transferase                                                   | 2E-127 | 83 | <i>Nitrosomonas eutropha</i> C91       | YP_747060    |
| CDM24665       | LC    | ++     | 2    | 8     | hypothetical protein                                                        | 6E-128 | 62 | <i>Pusillimonas</i> sp. T7-7           | YP_004416004 |
| CDM24668       | LC    | ++     | 4    | 13    | branched-chain alpha-keto acid dehydrogenase E1 component                   | 0.0    | 84 | <i>Pusillimonas</i> sp. T7-7           | YP_004416001 |
| CDM24732       | LC    | ++     | 4    | 15    | bifunctional riboflavin kinase/FMN adenylyltransferase                      | 6E-162 | 71 | <i>Pusillimonas noertemannii</i>       | WP_017523660 |
| CDM24744       | 2D    | 3.0    | 3    | 47    | peptidyl-prolyl cis-trans isomerase                                         | 1E-48  | 84 | <i>Pusillimonas</i> sp. T7-7           | YP_004417531 |
| CDM24755       | 2D    | 3.1    | 4    | 25    | superoxide dismutase [Fe]                                                   | 9E-117 | 82 | <i>Bordetella bronchiseptica</i> 253   | YP_006967574 |
| CDM24805       | LC    | ++     | 2    | 9     | flagellar biosynthesis protein FliH                                         | 1E-58  | 46 | <i>Bordetella pertussis</i> Tohama I   | NP_880144    |
| CDM24812       | LC    | ++     | 3    | 30    | flagellar biosynthesis protein FliO                                         | 2E-23  | 59 | <i>Pusillimonas noertemannii</i>       | WP_017525059 |
| CDM24890       | LC    | ++     | 7    | 49    | hns-like transcription regulator protein                                    | 3E-43  | 59 | <i>Pusillimonas noertemannii</i>       | WP_017525369 |
| CDM24905       | LC    | ++     | 3    | 9     | hypothetical protein                                                        | 0.0    | 81 | <i>Oligotropha carboxidovorans</i> OM5 | YP_002288631 |
| CDM24945       | LC    | ++     | 2    | 8     | ornithine cyclodeaminase                                                    | 5E-138 | 59 | <i>Cupriavidus taiwanensis</i>         | WP_018007161 |
| CDM24950       | 2D    | 2.8    | 8    | 40    | hypothetical protein                                                        | 2E-49  | 60 | <i>Bordetella bronchiseptica</i> RB50  | NP_888469    |
| CDM24952       | LC    | ++     | 2    | 7     | phosphate starvation protein PhoH                                           | 0.0    | 82 | <i>Pusillimonas noertemannii</i>       | WP_017524275 |
| CDM25009       | 2D/LC | 3.4/+  | 13/6 | 69/34 | acetoacetyl-CoA reductase                                                   | 1E-159 | 91 | <i>Pusillimonas</i> sp. T7-7           | YP_004415605 |
| CDM25024       | LC    | ++     | 3    | 8     | bifunctional enoyl-CoA hydratase/phosphate acetyltransferase                | 0.0    | 72 | <i>Alicyclophilus denitrificans</i> BC | YP_004128659 |
| CDM25241       | LC    | ++     | 6    | 20    | acyl-CoA dehydrogenase                                                      | 0.0    | 82 | <i>Thauera terpenica</i> 58Eu          | EPZ16240     |
| CDM25246       | 2D/LC | 3.0/++ | 9/2  | 38/11 | 3-hydroxyacyl-CoA dehydrogenase                                             | 5E-167 | 82 | <i>Azoarcus</i> sp. KH32C              | YP_007598290 |
| CDM25250       | LC    | ++     | 5    | 10    | perillyl-CoA hydratase                                                      | 0.0    | 58 | <i>Thauera terpenica</i> 58Eu          | EPZ16258     |
| CDM25251       | 2D/LC | 18/++  | 13/4 | 64/20 | 4-isopropenyl-2-oxo-cyclohexane-1-carboxyl-CoA hydrolase                    | 4E-167 | 88 | <i>Azoarcus</i> sp. KH32C              | YP_007598294 |
| CDM25252       | 2D/LC | 3.0/++ | 10/2 | 51/7  | 2-hydroxy-4-isopropenyl-cyclohexane-1-carboxyl-CoA dehydrogenase            | 1E-153 | 85 | <i>Azoarcus</i> sp. KH32C              | YP_007598295 |
| CDM25254       | LC    | ++     | 5    | 17    | acyl-CoA dehydrogenase                                                      | 0.0    | 90 | <i>Azoarcus toluclasticus</i>          | WP_018990727 |
| CDM25255       | LC    | ++     | 14   | 46    | oxidoreductase, FAD-binding                                                 | 0.0    | 73 | <i>Azoarcus toluclasticus</i>          | WP_018990723 |
| CDM25256       | 2D/LC | 19/++  | 4/2  | 35/14 | (R)-specific enoyl-CoA hydratase                                            | 1E-88  | 85 | <i>Thauera terpenica</i> 58Eu          | EPZ15051     |
| CDM25258       | LC    | ++     | 3    | 8     | acyl-CoA dehydrogenase                                                      | 0.0    | 92 | <i>Thauera terpenica</i> 58Eu          | EPZ15053     |
| CDM25259       | LC    | ++     | 16   | 32    | RND efflux transporter, outer membrane component                            | 0.0    | 62 | <i>Thauera terpenica</i> 58Eu          | EPZ15054     |
| CDM25260       | LC    | ++     | 4    | 27    | RND efflux transporter, periplasmic component                               | 0.0    | 80 | <i>Thauera terpenica</i> 58Eu          | EPZ15055     |
| CDM25261       | LC    | ++     | 5    | 21    | RND efflux transporter, periplasmic component                               | 4E-142 | 68 | <i>Thauera terpenica</i> 58Eu          | EPZ15056     |
| CDM25262       | LC    | ++     | 9    | 17    | RND efflux transporter, inner membrane component                            | 0.0    | 81 | <i>Thauera terpenica</i> 58Eu          | EPZ15057     |
| CDM25263       | LC    | ++     | 2    | 4     | acetoacetyl-CoA synthetase                                                  | 0.0    | 84 | <i>Thauera terpenica</i> 58Eu          | EPZ15058     |
| CDM25265, GeoC | LC    | ++     | 4    | 16    | perillate--CoA ligase                                                       | 0.0    | 71 | <i>Thauera terpenica</i> 58Eu          | EPZ15060     |

|                |       |        |       |       |                                                                                                            |        |    |                                        |              |
|----------------|-------|--------|-------|-------|------------------------------------------------------------------------------------------------------------|--------|----|----------------------------------------|--------------|
| CDM25267, GeoA | 2D/LC | 42/++  | 15/4  | 52/19 | geraniol dehydrogenase                                                                                     | 0.0    | 84 | <i>Thauera terpenica</i> 58Eu          | EPZ14350     |
| CDM25268       | LC    | ++     | 2     | 9     | hypothetical protein                                                                                       | 8E-117 | 74 | <i>Thauera terpenica</i> 58Eu          | EPZ14349     |
| CDM25272, Ldi  | LC    | ++     | 2     | 8     | linalool dehydratase-isomerase precursor                                                                   | 8E-14  | 25 | <i>Stereum hirsutum</i> FP-91666 SS1   | EIM80109     |
| CDM25275       | LC    | ++     | 4     | 5     | acyl-CoA dehydrogenase                                                                                     | 4E-106 | 54 | <i>Azoarcus toluclasticus</i>          | WP_018990670 |
| CDM25279       | LC    | ++     | 4     | 8     | hypothetical protein                                                                                       | 1E-120 | 68 | <i>Pseudomonas</i> sp. 19-riim         | AEO27372     |
| CDM25281, GeoB | 2D/LC | 15/++  | 16/14 | 43/37 | geraniol dehydrogenase                                                                                     | 0.0    | 91 | <i>Thauera terpenica</i> 58Eu          | EPZ16290     |
| CDM25282       | LC    | ++     | 3     | 8     | acyl-CoA dehydrogenase                                                                                     | 0.0    | 89 | <i>Thauera terpenica</i> 58Eu          | EPZ16289     |
| CDM25284, CtmG | LC    | ++     | 3     | 13    | hypothetical protein                                                                                       | 5E-35  | 39 | <i>Azoarcus</i> sp. KH32C              | YP_007598506 |
| CDM25285, CtmF | LC    | ++     | 14/2  | 35/10 | NADH:ferredoxin oxidoreductase                                                                             | 4E-147 | 56 | <i>Caulobacter</i> sp.AP07             | WP_007674692 |
| CDM25286, CtmE | 2D/LC | 6.3/++ | 3     | 36    | ferredoxin, 2Fe-2S                                                                                         | 1E-32  | 50 | <i>Caulobacter crescentus</i> CB15     | NP_422318    |
| CDM25289, CtmB | 2D/LC | 3.4/++ | 17/9  | 40/27 | limonene dehydrogenase, beta subunit                                                                       | 4E-131 | 41 | <i>Deltaproteobacterium</i> NaphS2     | WP_006422074 |
| CDM25290, CtmA | LC    | ++     | 5     | 11    | limonene dehydrogenase, alpha subunit                                                                      | 5E-57  | 30 | <i>Deltaproteobacterium</i> NaphS2     | WP_006422074 |
| CDM25291       | LC    | ++     | 3     | 11    | acetyl-CoA acetyltransferases                                                                              | 0.0    | 79 | <i>Thauera terpenica</i> 58Eu          | EPZ16237     |
| CDM25294       | LC    | ++     | 3     | 10    | hypothetical protein                                                                                       | 2E-83  | 68 | <i>Thauera terpenica</i> 58Eu          | EPZ16282     |
| CDM25298       | LC    | ++     | 4     | 10    | hypothetical protein                                                                                       | 0.0    | 72 | <i>Thauera terpenica</i> 58Eu          | EPZ16231     |
| CDM25299       | LC    | ++     | 4     | 13    | acetyl-CoA acetyltransferase                                                                               | 0.0    | 90 | <i>Thauera terpenica</i> 58Eu          | EPZ16230     |
| CDM25301       | LC    | ++     | 5     | 22    | electron transfer flavoprotein, beta subunit                                                               | 7E-133 | 78 | <i>Thauera terpenica</i> 58Eu          | EPZ16226     |
| CDM25303       | LC    | ++     | 3     | 14    | isobutyryl-CoA dehydrogenase                                                                               | 0.0    | 83 | <i>Pusillimonas</i> sp. T7-7           | YP_004416217 |
| CDM25304       | LC    | ++     | 3     | 11    | 3-hydroxyisobutyryl-CoA hydrolase                                                                          | 7E-166 | 63 | <i>Pusillimonas</i> sp. T7-7           | YP_004416218 |
| CDM25305       | 2D    | 4.9    | 9     | 40    | 3-hydroxyisobutyrate dehydrogenase                                                                         | 4E-157 | 80 | <i>Achromobacter arsenitoxydans</i>    | WP_008167752 |
| CDM25315       | LC    | ++     | 2     | 16    | NUDIX hydrolase                                                                                            | 7E-91  | 66 | <i>Pusillimonas noertemannii</i>       | WP_017525801 |
| CDM25396       | LC    | ++     | 6     | 16    | benzoyl-CoA oxygenase component B                                                                          | 0.0    | 85 | <i>Pusillimonas noertemannii</i>       | WP_017525211 |
| CDM25490       | LC    | ++     | 3     | 21    | deoxycytidine triphosphate deaminase                                                                       | 2E-128 | 96 | <i>Alcaligenes faecalis</i>            | WP_003803918 |
| CDM25598       | LC    | ++     | 3     | 5     | SAM-dependent methyltransferase                                                                            | 0.0    | 70 | <i>Cellvibrio japonicus</i> Ueda107    | YP_001982373 |
| CDM25622       | LC    | ++     | 5     | 8     | GTP-binding protein                                                                                        | 0.0    | 52 | <i>Thauera</i> sp. MZ1T                | YP_002354075 |
| CDM25656       | LC    | ++     | 6     | 13    | hypothetical protein                                                                                       | 0.0    | 55 | <i>Gloeobacter violaceus</i> PCC 742   | NP_925494    |
| CDM25709       | LC    | ++     | 5     | 13    | phosphoglucomutase                                                                                         | 0.0    | 72 | <i>Pusillimonas</i> sp. T7-7           | YP_004417296 |
| CDM25726       | LC    | ++     | 3     | 16    | UDP-glucose dehydrogenase                                                                                  | 0.0    | 85 | <i>Bordetella avium</i> 197N           | YP_785044    |
| CDM25743       | LC    | +      | 11    | 23    | glycyl-tRNA synthetase beta subunit                                                                        | 0.0    | 70 | <i>Bordetella petrii</i> DSM 12804     | YP_001629381 |
| CDM25779       | LC    | ++     | 4     | 17    | UDP-N-acetylmuramate--L-alanine ligase                                                                     | 0.0    | 85 | <i>Pusillimonas</i> sp. T7-7           | YP_004415177 |
| CDM25780       | LC    | ++     | 2     | 8     | UDP-N-acetylglucosamine--N-acetylmuramyl-(pentapeptide) pyrophosphoryl-UDP N-acetylglucosamine transferase | 4E-169 | 71 | <i>Pusillimonas noertemannii</i>       | WP_017524749 |
| CDM25847       | LC    | ++     | 3     | 15    | 3-methyladenine DNA glycosylase                                                                            | 5E-120 | 75 | <i>Alicyclophilus denitrificans</i> BC | YP_004125978 |
| CDM25890       | LC    | ++     | 4     | 11    | ubiquinone biosynthesis hydroxylase UbiH                                                                   | 8E-151 | 60 | <i>Pusillimonas noertemannii</i>       | WP_017525509 |
| CDM25903       | 2D/LC | 4.4/0  | 9/3   | 36/17 | F0F1 ATP synthase subunit gamma                                                                            | 8E-177 | 83 | <i>Pusillimonas</i> sp. T7-7           | YP_004417598 |
| CDM25967       | 2D    | 3.5    | 22    | 63    | PmbA peptidase                                                                                             | 0.0    | 74 | <i>Pusillimonas</i> sp. T7-7           | YP_004418694 |
| CDM26011       | LC    | ++     | 2     | 7     | ABC-type amino acid transport system, permease component                                                   | 0.0    | 81 | <i>Pusillimonas</i> sp. T7-7           | YP_004417548 |

|          |       |         |      |       |                                                            |     |    |                                            |              |
|----------|-------|---------|------|-------|------------------------------------------------------------|-----|----|--------------------------------------------|--------------|
| CDM26059 | 2D/LC | -1.1/++ | 9/5  | 16/12 | outer membrane esterase                                    | 0.0 | 52 | <i>Pseudogulbenkiania ferrooxidans</i>     | WP_021475494 |
| CDM26067 | 2D/LC | 3.3/++  | 14/2 | 54/5  | ABC-type dipeptide transport system, periplasmic component | 0.0 | 62 | <i>Enterobacter aerogenes</i><br>KCTC 2190 | YP_004590478 |
